# Supplementary material for: UGRP1-modulated MARCO+ alveolar macrophages contribute to age-related lung fibrosis
Source: PubMed Central journal article supplement (PMC10024420; doi:10.1186/s12979-023-00338-8), 2023-03-18

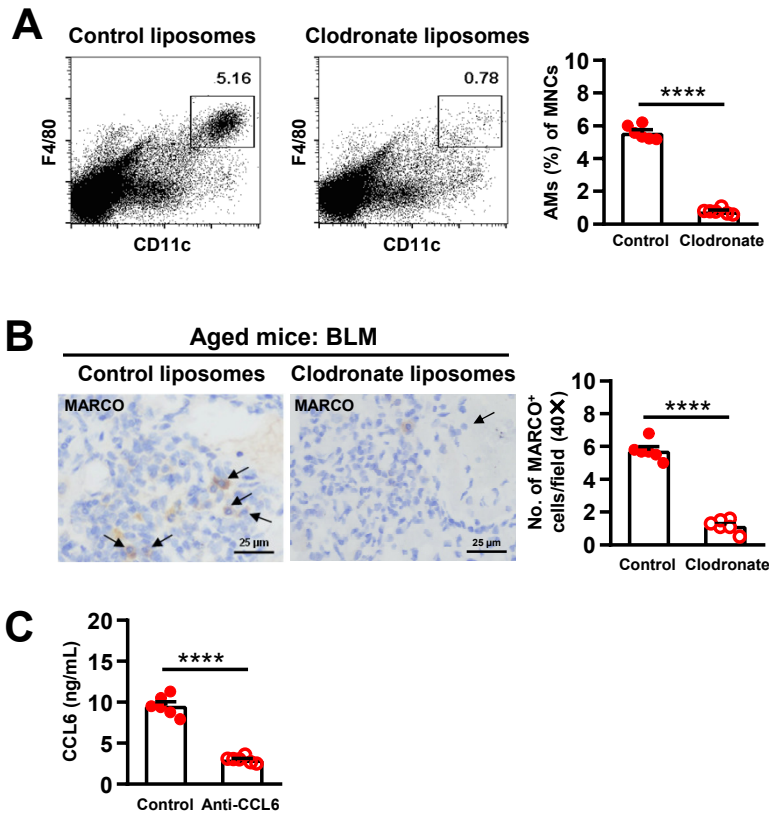

Supplement: 12979_2023_338_MOESM5_ESM.pdf [file 12979_2023_338_MOESM5_ESM.pdf]
