# Supplementary material for: UGRP1-modulated MARCO+ alveolar macrophages contribute to age-related lung fibrosis
Source: Springer Nature journal article supplement (doi:10.1186/s12979-023-00338-8), 2023-03-18

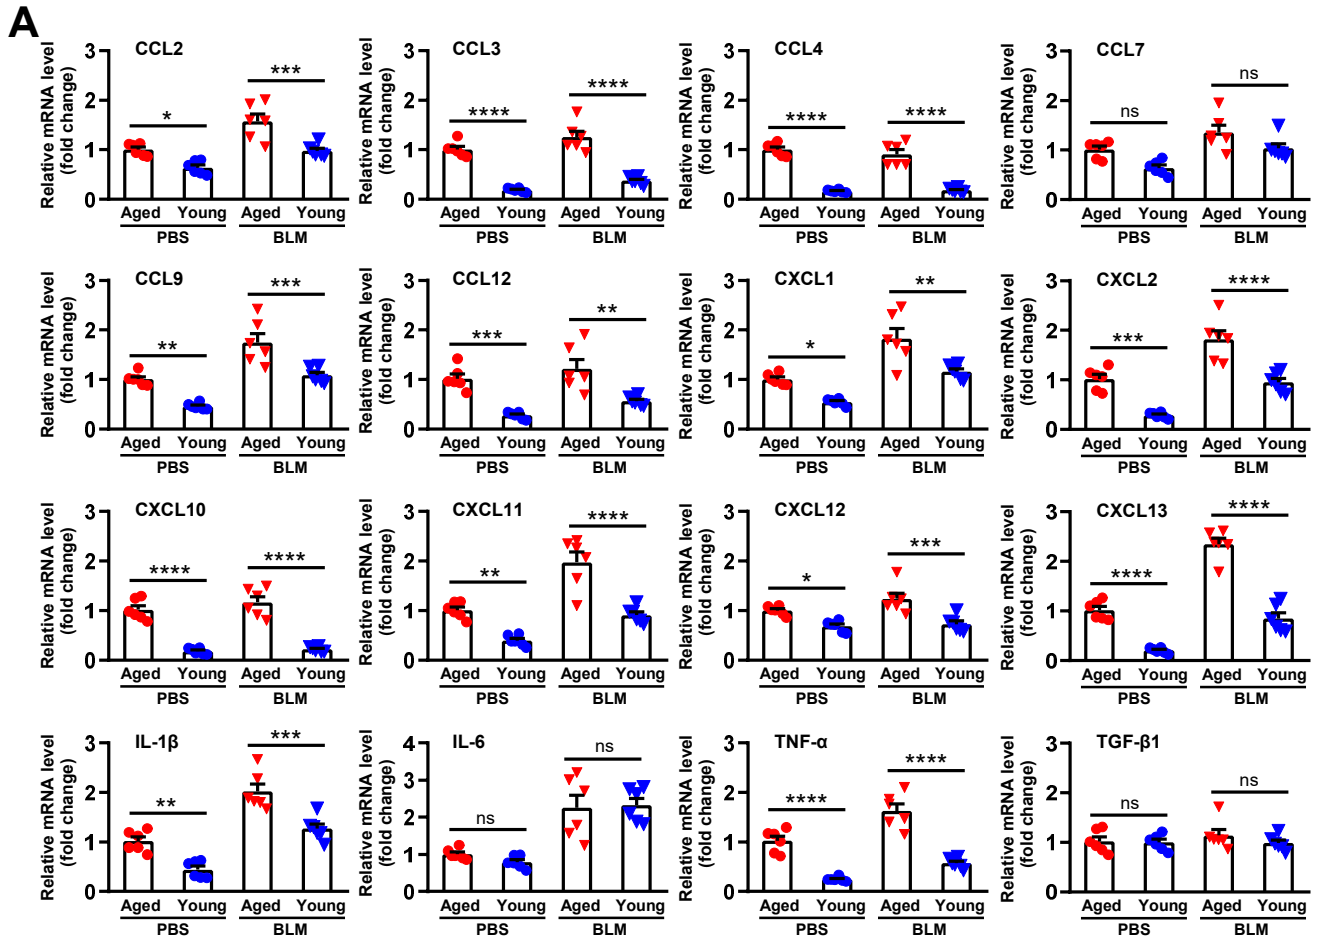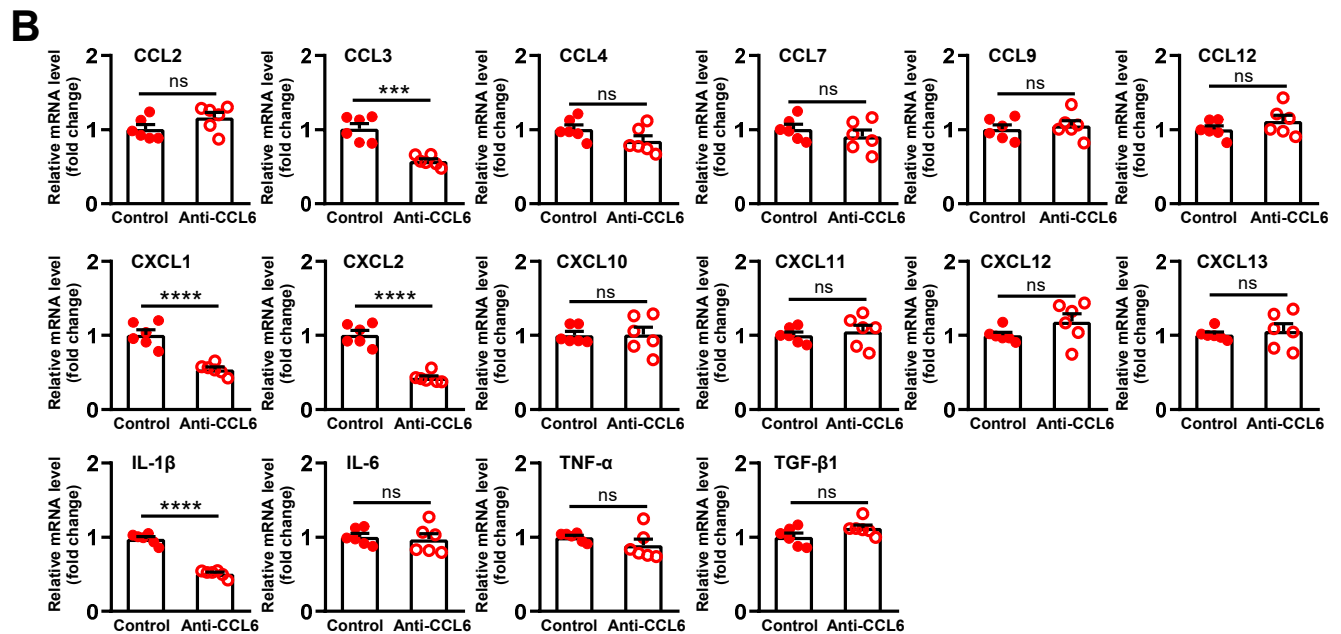

Supplement: MOESM7 [file 24641018]
